# Supplementary material
Source: PubMed Central journal article supplement (PMC7386252)

### Uncropped blots from Fig. 2a

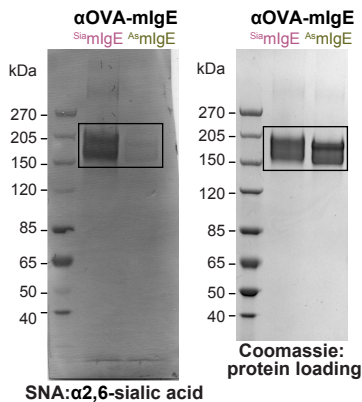

### Uncropped blots from Fig. 2h

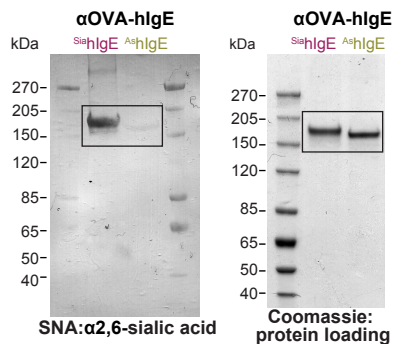

### Uncropped blots from Fig. 3a

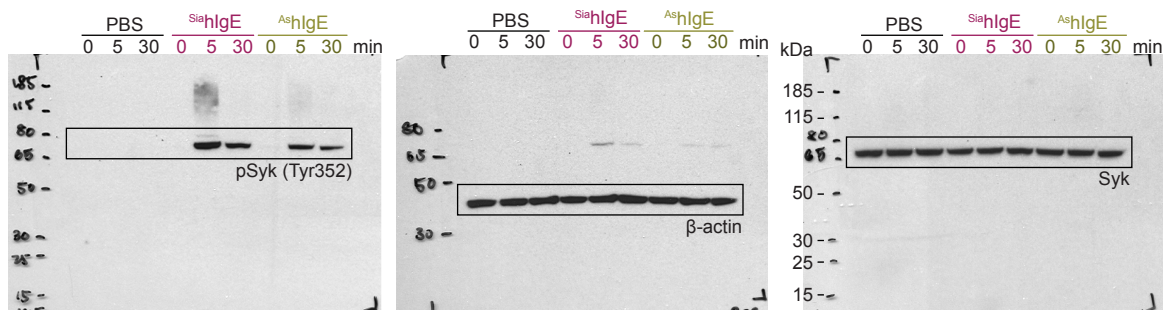

### Uncropped blots from Extended Data Fig. 4a

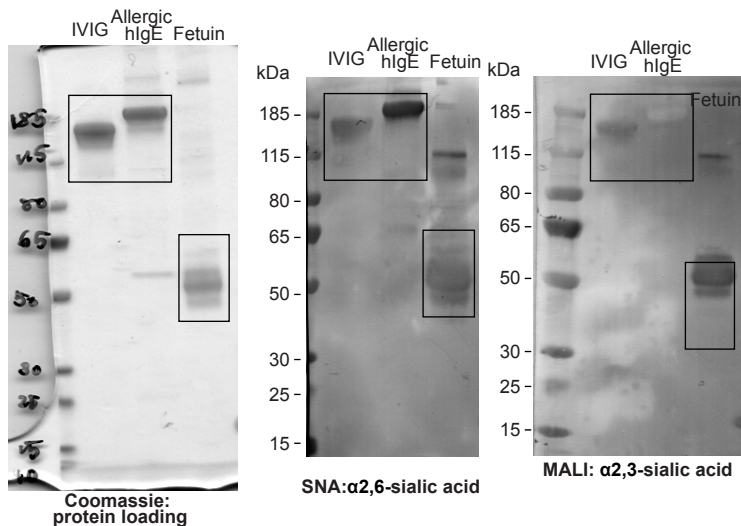

## Uncropped blots from Extended Data Fig. 9a

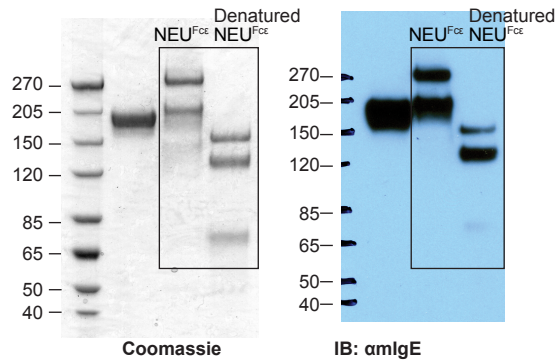

## Uncropped blots from Extended Data Fig. 9

**d**

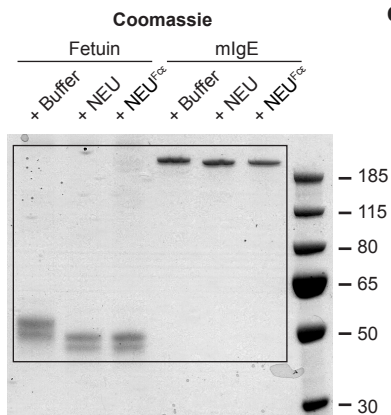

**e**

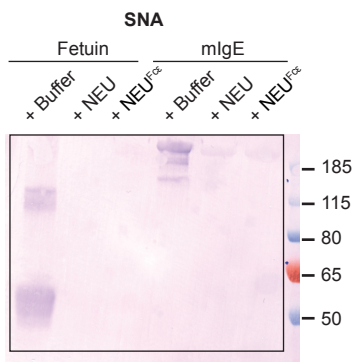

**f**

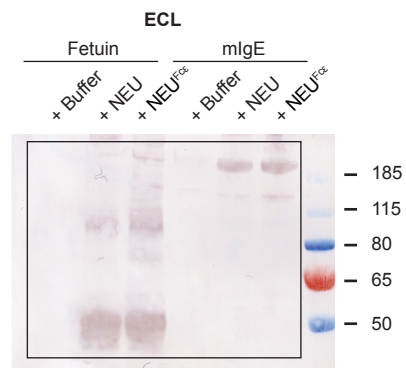

Supplement: NIHMS1575439-supplement-2.pdf [file NIHMS1575439-supplement-2.pdf]
